# Supplementary material
Source: publisher figshare collection journal article supplement (https://asha.figshare.com/articles/dataset/_/15243357)
Supplement: Supplementary file 1 [file 1]

**Supplemental Material S2.** Results and edits for the ingredient label Delphi Rounds, listed in order of decreasing agreement after Round 4. Negative and positive numbers represent consensus towards the ingredient label being non-measurable/redundant versus measurable/unique, respectively. R4 = round 4; R5 = round 5; R6 = round 6; Dash = ingredient was not judged due to being deleted or incorporated into another ingredient(s) in a previous Round; Arrow = ingredient was not discussed during Round 5; C = ingredient was not judged on this construct due to attaining supra-majority consensus ( $\geq 8$  out of 10 experts); E = edited by splitting into multiple ingredients or incorporating into another ingredient(s); D = deleted from list; X = exempt from expert measurability and uniqueness judgements; Gray shading = ingredient labels were not yet created, so they were not present in that round.

| Ingredient                                  | Measurable<br>(# experts) |    |    | Unique<br>(# experts) |    |    | Overlapping/<br>redundant targets<br>mentioned in Round 4 by $\geq 3$ experts     | If incorporated into another ingredient,<br>which ingredient                 |
|---------------------------------------------|---------------------------|----|----|-----------------------|----|----|-----------------------------------------------------------------------------------|------------------------------------------------------------------------------|
|                                             | R4                        | R5 | R6 | R4                    | R5 | R6 |                                                                                   |                                                                              |
| Phonation time                              | 10                        | E  | —  | 10                    | E  | —  | None                                                                              | Provide opportunities to practice voicing,<br>vocal fold adduction exercises |
| Provide voice amplification                 | 10                        | C  | C  | 9                     | C  | C  | None                                                                              | Not applicable                                                               |
| Loudness glide                              | 10                        | E  | —  | 9                     | E  | —  | None                                                                              | Provide opportunities to practice voicing,<br>vocal fold adduction exercises |
| Modify the environment                      | 10                        | E  | —  | 8                     | E  | —  | None                                                                              | Apply noise                                                                  |
| Vocal fry                                   | 10                        | E  | —  | 8                     | E  | —  | None                                                                              | Provide opportunities to practice voicing                                    |
| Pitch glide                                 | 10                        | E  | —  | 7                     | E  | —  | Siren, vocalizes                                                                  | Provide opportunities to practice voicing,<br>vocal fold adduction exercises |
| Vocalizes                                   | 10                        | E  | —  | 7                     | E  | —  | Siren, pitch glide                                                                | Provide opportunities to practice voicing,<br>vocal fold adduction exercises |
| Yawn/sigh                                   | 10                        | E  | —  | 7                     | E  | —  | Inverted megaphone                                                                | Provide opportunities to practice voicing                                    |
| Semi-occluded vocal tract<br>(SOVT) posture | 10                        | C  | C  | -6                    | 10 | C  | Inverted megaphone, lip trill, tongue<br>trill, lip/tongue trill, siren, gargling | Not applicable                                                               |
| Lip trill                                   | 10                        | E  | —  | -6                    | E  | —  | SOVT, tongue trill, lip/tongue trill                                              | SOVT                                                                         |
| Inspiratory volume exercises                | 9                         | E  | —  | 10                    | E  | —  | None                                                                              | Provide opportunities to practice breathing                                  |
| Expiratory volume exercises                 | 9                         | E  | —  | 10                    | E  | —  | None                                                                              | Provide opportunities to practice breathing                                  |
| Inspiratory rate exercises                  | 9                         | E  | —  | 10                    | E  | —  | None                                                                              | Provide opportunities to practice breathing                                  |
| Expiratory rate exercises                   | 9                         | E  | —  | 10                    | E  | —  | None                                                                              | Provide opportunities to practice breathing                                  |
| Inhalation phonation                        | 9                         | E  | —  | 9                     | E  | —  | None                                                                              | Provide opportunities to practice voicing                                    |
| Provide auditory masking                    | 9                         | E  | —  | 9                     | E  | —  | None                                                                              | Apply noise                                                                  |
| Inspiratory resistance exercises            | 9                         | C  | C  | 8                     | C  | C  | None                                                                              | Not applicable                                                               |
| Expiratory resistance exercises             | 9                         | C  | C  | 8                     | C  | C  | None                                                                              | Not applicable                                                               |
| Flow phonation                              | 9                         | E  | —  | 7                     | E  | —  | None                                                                              | Provide opportunities to practice voicing                                    |
| Inverted megaphone                          | 9                         | E  | —  | -7                    | E  | —  | SOVT, yawn/sigh                                                                   | SOVT                                                                         |
| Tongue trill                                | 9                         | E  | —  | -7                    | E  | —  | SOVT, lip trill, lip/tongue trill                                                 | SOVT                                                                         |
| Topical numbing                             | 8                         | C  | C  | 10                    | C  | C  | None                                                                              | Not applicable                                                               |

|                                         |   |    |    |     |    |   |                                                                                   |                                                                                  |
|-----------------------------------------|---|----|----|-----|----|---|-----------------------------------------------------------------------------------|----------------------------------------------------------------------------------|
| Provide Pedagogy/Counseling information | 8 | E  | —  | 10  | E  | — | None                                                                              | Provide vocal hygiene information                                                |
| Provide delayed auditory feedback       | 8 | E  | —  | 10  | E  | — | None                                                                              | Apply noise                                                                      |
| Half-swallow boom                       | 8 | E  | —  | 8   | E  | — | None                                                                              | Vocal fold adduction exercises                                                   |
| Vegetative vocalizations                | 8 | E  | —  | 7   | E  | — | None                                                                              | Provide opportunities to practice voicing, vocal fold adduction exercises        |
| Apply manual touch                      | 8 | E  | —  | 7   | E  | — | None                                                                              | Apply pressure                                                                   |
| Provide effort cueing                   | 8 | E  | —  | 5   | E  | — | Cue not otherwise specified                                                       | Feedback, volition ingredients                                                   |
| Apply pressure                          | 8 | 10 | C  | -6  | 10 | C | Hyoid pushback, thyroid pulldown, apply shaking, manual stretch, manual traction  | Not applicable                                                                   |
| Siren                                   | 8 | E  | —  | -6  | E  | — | SOVT, pitch glide, vocalizes                                                      | Provide opportunities to practice voicing                                        |
| Lip-tongue trill                        | 8 | E  | —  | -10 | E  | — | SOVT, lip trill, tongue trill                                                     | SOVT                                                                             |
| Apply heat                              | 7 | →  | 9  | 10  | C  | C | None                                                                              | Not applicable                                                                   |
| Apply vibration                         | 7 | E  | —  | 9   | E  | — | None                                                                              | Apply pressure                                                                   |
| Chewing                                 | 7 | E  | —  | 8   | E  | — | None                                                                              | Provide opportunities to practice voicing                                        |
| Provide auditory cueing                 | 7 | E  | —  | 8   | E  | — | None                                                                              | Feedback, volition ingredients, opportunities to practice sensory discrimination |
| Physically occlude ear                  | 7 | →  | 10 | 8   | C  | C | None                                                                              | Not applicable                                                                   |
| Gargling                                | 7 | E  | —  | 7   | E  | — | SOVT                                                                              | SOVT, provide opportunities to practice voicing, breathing                       |
| Inhale through constriction             | 7 | E  | —  | 7   | E  | — | Inspiratory/expiratory resistance                                                 | Provide opportunities to practice breathing                                      |
| Exhale through constriction             | 7 | E  | —  | 7   | E  | — | Inspiratory/expiratory resistance                                                 | Provide opportunities to practice breathing                                      |
| Apply stretch                           | 7 | E  | —  | 6   | E  | — | Hyoid pushback, thyroid pulldown, apply shaking, manual pressure, manual traction | Apply pressure                                                                   |
| Apply hyoid pushback                    | 7 | E  | —  | 6   | E  | — | Thyroid pulldown, manual pressure, manual stretch, manual traction                | Apply pressure                                                                   |
| Apply thyroid pulldown                  | 7 | E  | —  | -7  | E  | — | Hyoid pushback, apply shaking, manual pressure, manual stretch, manual traction   | Apply pressure                                                                   |
| Provide auditory model                  | 6 | E  | —  | 10  | E  | — | None                                                                              | Feedback, volition ingredients, opportunities to practice sensory discrimination |
| Apply low level light therapy           | 6 | →  | 7  | 10  | C  | C | None                                                                              | Not applicable                                                                   |
| Provide kinesthetic cueing              | 6 | E  | —  | 8   | E  | — | None                                                                              | Feedback, volition ingredients, opportunities to practice sensory discrimination |
| Apply traction                          | 6 | E  | —  | 5   | E  | — | Hyoid pushback, thyroid pulldown, apply shaking, manual pressure, manual stretch  | Apply pressure                                                                   |

|                                                                        |      |   |    |      |   |    |                        |                                                                  |
|------------------------------------------------------------------------|------|---|----|------|---|----|------------------------|------------------------------------------------------------------|
| Apply shaking                                                          | 5    | E | —  | 9    | E | —  | None                   | Apply pressure                                                   |
| Apply cold                                                             | -6/D | — | —  | 10/D | — | —  | None                   | Deleted – all experts said they never used this in voice therapy |
| Provide opportunities to practice voicing                              |      |   | 10 |      |   | 8  | Not present in Round 4 | Not applicable                                                   |
| Apply noise                                                            |      |   | 10 |      |   | 10 | Not present in Round 4 | Not applicable                                                   |
| Provide opportunities to practice sensory discrimination               |      |   | 9  |      |   | 10 | Not present in Round 4 | Not applicable                                                   |
| Provide opportunities to practice breathing                            |      |   | 10 |      |   | 9  | Not present in Round 4 | Not applicable                                                   |
| Provide opportunities to practice alignment/posture                    |      |   | 10 |      |   | 9  | Not present in Round 4 | Not applicable                                                   |
| Provide opportunities to practice modified levels of muscle activation |      |   | 9  |      |   | 7  | Not present in Round 4 | Not applicable                                                   |
| Provide feedback                                                       |      |   | 10 |      |   | 9  | Not present in Round 4 | Not applicable                                                   |
| Provide volition ingredients                                           |      |   | X  |      |   | X  | Not present in Round 4 | Not applicable                                                   |
| Provide vocal hygiene information                                      |      |   | 8  |      |   | 10 | Not present in Round 4 | Not applicable                                                   |
| Gross vocal fold adduction exercises                                   |      |   | 10 |      |   | 7  | Not present in Round 4 | Not applicable                                                   |

---
