# Supplementary material
Source: publisher figshare collection journal article supplement (https://asha.figshare.com/articles/dataset/_/15243357)
Supplement: Supplementary file 2 [file 1]

**Supplemental Material S1.** Results and edits for the target label Delphi Rounds, listed in order of decreasing agreement after Round 1. Negative and positive numbers represent consensus towards the target label being non-measurable/redundant versus measurable/unique, respectively. R1 = round 1; R2 = round 2; R3 = round 3; Dash = target was not judged due to being incorporated into another target(s) in a previous Round; C = target was not judged on this construct due to attaining supra-majority consensus ( $\geq 8$  out of 10 experts); E = edited by splitting into multiple targets or incorporating into another target(s); D = deleted from list; Gray shading = target labels were not yet created, so they were not present in that round.

| Target                                                                            | Measurable<br>(# experts) |     |    | Unique<br>(# experts) |       |    | Overlapping targets mentioned in Round 1 by<br>$\geq 3$ experts                                                    | Additional information about target<br>edits and consensus                                                                                                 |
|-----------------------------------------------------------------------------------|---------------------------|-----|----|-----------------------|-------|----|--------------------------------------------------------------------------------------------------------------------|------------------------------------------------------------------------------------------------------------------------------------------------------------|
|                                                                                   | R1                        | R2  | R3 | R1                    | R2    | R3 |                                                                                                                    |                                                                                                                                                            |
| Gross ab- or ad-duction of the true vocal folds (not during voicing) <sup>1</sup> | 10                        | C   | C  | 6                     | 10    | C  | Vocal effort, flow phonation, respiratory support                                                                  | Not applicable                                                                                                                                             |
| Pitch discrimination                                                              | 10                        | C   | C  | 6                     | 9     | C  | Vocal effort, respiratory support, pitch production                                                                | Not applicable                                                                                                                                             |
| Loudness discrimination                                                           | 10                        | C   | C  | 6                     | 9     | C  | Vocal effort, respiratory support                                                                                  | Not applicable                                                                                                                                             |
| Phonatory duration                                                                | 10                        | E   | —  | 5                     | -10/E | —  | Vocal effort, respiratory capacity, respiratory strength, respiratory support                                      | Incorporated into respiratory coordination with voicing                                                                                                    |
| Pitch                                                                             | 10                        | C   | C  | 5                     | 9     | C  | Vocal effort, respiratory support, pitch discrimination                                                            | Not applicable                                                                                                                                             |
| Glottal onset                                                                     | 10                        | C   | C  | 5                     | 8     | C  | Vocal effort, flow phonation, respiratory support, resonance                                                       | Not applicable                                                                                                                                             |
| Resonance                                                                         | 10                        | C   | C  | 5                     | 10    | C  | Vocal effort, kinesthetic discrimination, glottal onset, loudness production                                       | Not applicable                                                                                                                                             |
| Respiratory capacity                                                              | 10/E                      | —   | —  | 5/E                   | —     | —  | Vocal effort, respiratory strength, respiratory support, rib cage movement, abdominal movement, phonatory duration | Incorporated into respiratory coordination, rib cage movement, abdominal movement, clavicular movement, inspiratory/ expiratory muscle strength/ endurance |
| Voice rest (full or modified)                                                     | 10/E                      | —   | —  | -6/E                  | —     | —  | Vocal effort, use of vocal preservation strategies                                                                 | Incorporated into voice and vegetative laryngeal use strategies                                                                                            |
| Flow phonation                                                                    | 10                        | 5/E | —  | -7                    | 5/E   | —  | Vocal effort, respiratory smoothness, respiratory support, glottal onset, ab/adduction of vocal folds              | Incorporated into respiratory coordination during voicing                                                                                                  |
| Loudness                                                                          | 10                        | C   | C  | -7                    | 9     | C  | Vocal effort, respiratory support, resonance                                                                       | Not applicable                                                                                                                                             |
| Use of vocal preservation strategies                                              | 10/E                      | —   | —  | -7/E                  | —     | —  | Vocal effort, use of vocal preservation strategies                                                                 | Incorporated into voice and vegetative laryngeal use strategies                                                                                            |
| Roughness                                                                         | 10                        | C   | C  | -7                    | 7     | 10 | Vocal effort, respiratory support                                                                                  | Not applicable                                                                                                                                             |
| Rib cage movement                                                                 | 10                        | C   | C  | -8                    | 7     | 10 | Vocal effort, respiratory smoothness, respiratory capacity, respiratory smoothness, respiratory                    | Not applicable                                                                                                                                             |

|                                       |     |     |    |      |     |      | strength, respiratory support, abdominal movement                                                                                                                                                                                                                                                                                      |                                                                                                                                                                                                           |
|---------------------------------------|-----|-----|----|------|-----|------|----------------------------------------------------------------------------------------------------------------------------------------------------------------------------------------------------------------------------------------------------------------------------------------------------------------------------------------|-----------------------------------------------------------------------------------------------------------------------------------------------------------------------------------------------------------|
| Voice quality discrimination          | 9   | C   | C  | 6    | 9   | C    | Vocal effort                                                                                                                                                                                                                                                                                                                           | Not applicable                                                                                                                                                                                            |
| Pedagogical target                    | 9/E | —   | —  | 6/E  | —   | —    | Vocal effort                                                                                                                                                                                                                                                                                                                           | Incorporated into voice and vegetative laryngeal use strategies, hydration strategies, reflux strategies, recreational drug use                                                                           |
| Respiratory strength                  | 9/E | —   | —  | 5/E  | —   | —    | Vocal effort, respiratory capacity, respiratory support, rib cage movement, phonatory duration                                                                                                                                                                                                                                         | Split into inspiratory strength and expiratory strength                                                                                                                                                   |
| Kinesthetic discrimination            | 9   | C   | C  | -7   | 7   | 10   | Vocal effort, resonance                                                                                                                                                                                                                                                                                                                | Not applicable                                                                                                                                                                                            |
| Vocal effort                          | 9   | C   | D  | -8   | 6   | -8/D | All other targets                                                                                                                                                                                                                                                                                                                      | Deleted – it appears to always be an aim                                                                                                                                                                  |
| Use of reflux strategies              | 8   | 10  | C  | 8    | 10  | C    | None                                                                                                                                                                                                                                                                                                                                   | Not applicable                                                                                                                                                                                            |
| Counseling targets                    | 8/E | —   | —  | 6/E  | —   | —    | None                                                                                                                                                                                                                                                                                                                                   | Voice and vegetative laryngeal use strategies, hydration strategies, reflux strategies, recreational drug use                                                                                             |
| Muscle activation levels <sup>2</sup> | 8   | C   | C  | -9   | 6   | 9    | Alignment, vocal effort, passive range of motion, respiratory support, pain                                                                                                                                                                                                                                                            | Not applicable                                                                                                                                                                                            |
| Respiratory support                   | 8/E | 8/E | —  | -9/E | 7/E | —    | Alignment, muscle activation, vocal effort, respiratory smoothness, flow phonation, respiratory capacity, respiratory strength, rib cage movement, abdominal movement, roughness, glottal onset, phonatory duration, ab/adduction of vocal folds, pitch production, pitch discrimination, loudness production, loudness discrimination | Split into respiratory support and respiratory coordination (after R1); Incorporated into respiratory coordination during voicing and respiratory coordination for/during vegetative breathing (after R2) |
| Alignment                             | 7   | 9   | C  | 6    | 9   | C    | Muscle activation, vocal effort, respiratory support                                                                                                                                                                                                                                                                                   | Not applicable                                                                                                                                                                                            |
| Respiratory smoothness                | 7/E | —   | —  | -7/E | —   | —    | Vocal effort, flow phonation, respiratory support, rib cage movement                                                                                                                                                                                                                                                                   | Incorporated into respiratory coordination during voicing, respiratory coordination for/during vegetative breathing, rib cage movement, abdominal movement, clavicular movement                           |
| Abdominal movement <sup>3</sup>       | 7   | 7   | 10 | -8   | 7   | 10   | Vocal effort, respiratory capacity, respiratory support, rib cage movement                                                                                                                                                                                                                                                             | Not applicable                                                                                                                                                                                            |
| Active range of motion                | 6   | 6   | 10 | -7   | -7  | 9    | Muscle activation, vocal effort, active range of motion                                                                                                                                                                                                                                                                                | Not applicable                                                                                                                                                                                            |
| Passive range of motion               | 6   | 6   | 10 | -7   | -7  | 9    | Muscle activation, vocal effort, passive range of                                                                                                                                                                                                                                                                                      | Not applicable                                                                                                                                                                                            |

| Pain/discomfort/soreness                                   | 8 | C   | C    | 6 | 5   | 10   | motion<br>Muscle activation, vocal effort | Not applicable                                                                                                  |
|------------------------------------------------------------|---|-----|------|---|-----|------|-------------------------------------------|-----------------------------------------------------------------------------------------------------------------|
| Respiratory coordination                                   |   | 7/E | —    |   | 7/E | —    | Added per experts after Round 1           | Split into respiratory coordination during voicing and respiratory coordination for/during vegetative breathing |
| Breathiness                                                |   | 10  | C    |   | 10  | C    | Added per experts after Round 1           | Not applicable                                                                                                  |
| Strain                                                     |   | 9   | C    |   | 9   | C    | Added per experts after Round 1           | Not applicable                                                                                                  |
| Overall dysphonia                                          |   | 10  | -9/D |   | -6  | -9/D | Added per experts after Round 1           | Deleted – it appears to always be an aim                                                                        |
| Clavicular movement                                        |   | 10  | C    |   | 10  | C    | Added per experts after Round 1           | Not applicable                                                                                                  |
| Inspiratory muscle endurance                               |   | 10  | C    |   | 10  | C    | Added per experts after Round 1           | Not applicable                                                                                                  |
| Expiratory muscle endurance                                |   | 10  | C    |   | 10  | C    | Added per experts after Round 1           | Not applicable                                                                                                  |
| Inspiratory muscle strength                                |   | 10  | C    |   | 10  | C    | Added per experts after Round 1           | Not applicable                                                                                                  |
| Expiratory muscle strength                                 |   | 10  | C    |   | 10  | C    | Added per experts after Round 1           | Not applicable                                                                                                  |
| Vocal endurance                                            |   | 10  | C    |   | 10  | C    | Added per experts after Round 1           | Not applicable                                                                                                  |
| Voice and vegetative laryngeal use strategies <sup>4</sup> |   | 10  | C    |   | 10  | C    | Added per experts after Round 1           | Not applicable                                                                                                  |
| Hydration strategies                                       |   | 10  | C    |   | 10  | C    | Added per experts after Round 1           | Not applicable                                                                                                  |
| Recreational drug use                                      |   | 10  | C    |   | 10  | C    | Added per experts after Round 1           | Not applicable                                                                                                  |
| Intelligibility                                            |   | 10  | C    |   | 10  | C    | Added per experts after Round 1           | Not applicable                                                                                                  |
| Comprehensibility                                          |   | 10  | C    |   | 10  | C    | Added per experts after Round 1           | Not applicable                                                                                                  |
| Respiratory coordination during voicing                    |   |     | 10   |   |     | 10   | Added per experts after Round 2           | Not applicable                                                                                                  |
| Respiratory coordination for/during vegetative breathing   |   |     | 10   |   |     | 10   | Added per experts after Round 2           | Not applicable                                                                                                  |
| Vocal fry                                                  |   |     | 10   |   |     | 10   | Added per experts after Round 2           | Not applicable                                                                                                  |
| Supraglottal phonation                                     |   |     | 10   |   |     | 10   | Added per experts after Round 2           | Not applicable                                                                                                  |

<sup>1</sup>original label: *ab/adduction of the vocal folds*; <sup>2</sup>original label: *muscle tension*; <sup>3</sup>original label: *diaphragmatic breathing*; <sup>4</sup>original label: *voice use strategies*
